# Supplementary material for: The Influence of Foreign Direct Investment on Sustainable Development: The Moderating Role of Institutional Quality – Evidence From a Bayesian Approach.
Source: Research Square preprint supplement (doi:10.21203/rs.3.rs-6997509/v1), 2025-09-23
Supplement: Supplementary file 1 [file e95f668da015057c89819da6.docx]

**Appendix 1: Countries included in the study**

**Developed contries:** Australia, Austria, Bahamas The, Bahrain, Belgium, Canada, Croatia, Denmark, Estonia, Finland, France, Germany, Greece, Iceland, Israel, Italy, Japan, Latvia, Lithuania, New Zealand, Norway, Poland, Portugal, Singapore, Slovak Republic, Slovenia, Spain, Sweden, Switzerland, United States.

**Developing contries:** Albania, Algeria, Belize, Brazil, Bulgaria, Cameroon, Chile, China, Costa Rica, Cote d'Ivoire, El Salvador, Georgia, Ghana, India, Indonesia, Malaysia, Mauritius, Moldova, Pakistan, Peru, Romania, Samoa, Turkiye, Viet Nam

**Least developed contries:** Benin, Burkina Faso, Burundi, Gambia The, Guinea, Mali, Niger, Sierra Leone, Tanzania, Togo, Uganda

**Appendix 2: The variables in the model**

| **Sign** | **Variable** | **Expected sign** | **Measure** | **Research** | **Source** |
| --- | --- | --- | --- | --- | --- |
| Dependent variable | | | | | |
| SDI | Sustainable Development Index |  | Index created based on the 17 Sustainable Development Goals (SDGs) established by the United Nations. | Hickel (2020), Scalamonti (2024) | Economic and Affairs (2022) |
| Independent variable | | | | | |
| FDI | Foreign direct investment | + | Foreign direct investment, net inflows (% of GDP) | Javorcik (2004), Yakubu and Mikhail (2019); Ayamba et al. (2020) | WB |
| IQ | institutional quality | + | Measuring six dimensions of governance: Voice and Accountability, Political Stability and Absence of Violence/Terrorism, Government Effectiveness, Regulatory Quality, Rule of Law, and Control of Corruption. | Javorcik (2004), Cole et al. (2006) | The author calculated the data using the PCA method based on the data source of WB. |
| FDI*IQ | FDI and IQ interaction variable | + | Product of FDI and IQ | Abdouli & Hammami (2016), Yakubu & Mikhail, (2019), Smith et al. (2020) | The author calculated based on the data source. |
| TRA | Economic openness | + | Exports of goods and services (% of GDP) | Ji et al. (2022) | WB |
| EDU | Education | - | Government expenditure on education, total (% of GDP) | Baldacci et al. (2008) | WB |
| POP | Population growth | - | Population growth (annual %) | Headey & Hodge (2009) | WB |
| GFCF | Infrastructure | + | Gross fixed capital formation (% of GDP) | Adegboye et al. (2020), Eze et al. (2019) |  |
| INF | Inflation | - | Inflation, consumer prices (annual %) | Dinç & Gökmen (2019) | WB |

**Appendix 3: The description of variables in the model**

| **Variable** | **Obs** | **Mean** | **Std. dev.** | **Min** | **Max** |
| --- | --- | --- | --- | --- | --- |
| **Developed countries** | | | | |
| SDI | 465 | 77.082 | 5.384 | 58.198 | 86.509 |
| FDI | 465 | 3.278 | 6.009 | -32.547 | 36.803 |
| IQ | 465 | 0.822 | 0.123 | 0.478 | 1.000 |
| FDI_IQ | 465 | 2.718 | 5.555 | -31.891 | 31.481 |
| TRA | 465 | 50.779 | 32.728 | 10.074 | 228.994 |
| EDU | 465 | 5.125 | 1.363 | 1.988 | 8.584 |
| POP | 465 | 0.517 | 1.075 | -4.170 | 6.569 |
| GFCF | 465 | 22.039 | 3.560 | 10.970 | 34.523 |
| INF | 465 | 2.203 | 2.708 | -2.318 | 19.705 |
| **Developing countries** | | | | | |
| SDI | 360 | 67.060 | 6.454 | 50.171 | 77.807 |
| FDI | 360 | 3.506 | 2.782 | -0.613 | 18.900 |
| IQ | 360 | 0.516 | 0.134 | 0.248 | 0.834 |
| FDI_IQ | 360 | 1.941 | 1.796 | -0.318 | 12.288 |
| TRA | 360 | 34.389 | 17.412 | 8.222 | 99.500 |
| EDU | 360 | 4.169 | 1.324 | 0.864 | 9.510 |
| POP | 360 | 0.931 | 1.076 | -3.468 | 3.139 |
| GFCF | 360 | 24.338 | 7.430 | 7.091 | 44.519 |
| INF | 360 | 5.059 | 5.788 | -1.569 | 72.309 |
| **Least developed countries** | | | | | |
| SDI | 165 | 51.984 | 2.973 | 45.161 | 60.285 |
| FDI | 165 | 3.311 | 3.397 | -2.575 | 20.721 |
| IQ | 165 | 0.303 | 0.072 | 0.164 | 0.471 |
| FDI_IQ | 165 | 1.053 | 1.180 | -0.851 | 7.887 |
| TRA | 165 | 19.887 | 8.812 | 4.549 | 56.219 |
| EDU | 165 | 3.288 | 1.299 | 1.581 | 9.442 |
| POP | 165 | 2.896 | 0.464 | 1.722 | 5.066 |
| GFCF | 165 | 21.940 | 7.636 | 5.656 | 52.418 |
| INF | 165 | 5.837 | 5.556 | -3.233 | 27.208 |

**Appendix 4: Table of correlations between variables**

|  | **SDGI** | **IQ** | **FDI** | **FDI_IQ** | **POP** | **GFCF** | **INF** | **EDU** |
| --- | --- | --- | --- | --- | --- | --- | --- | --- |
| **SDGI** | 1 |  |  |  |  |  |  |  |
| **IQ** | 0.8576 | 1 |  |  |  |  |  |  |
| **FDI** | -0.0337 | 0.0516 | 1 |  |  |  |  |  |
| **FDI_IQ** | 0.1106 | 0.2135 | 0.9559 | 1 |  |  |  |  |
| **POP** | -0.6932 | -0.5088 | -0.0246 | -0.1036 | 1 |  |  |  |
| **GFCF** | 0.0114 | -0.0288 | 0.0939 | 0.0529 | 0.0445 | 1 |  |  |
| **INF** | -0.2787 | -0.298 | 0.0693 | -0.0004 | 0.17 | 0.029 | 1 |  |
| **EDU** | 0.6064 | 0.5723 | -0.1155 | -0.0305 | -0.2776 | -0.0317 | -0.1534 | 1 |
